# Supplementary material for: Collagen XVII inhibits breast cancer cell proliferation and growth through deactivation of the AKT/mTOR signaling pathway
Source: PubMed Central journal article supplement (PMC8297889; doi:10.1371/journal.pone.0255179), 2021-07-22
Supplement: pone.0255179.s002.pdf [file pone.0255179.s002.pdf]

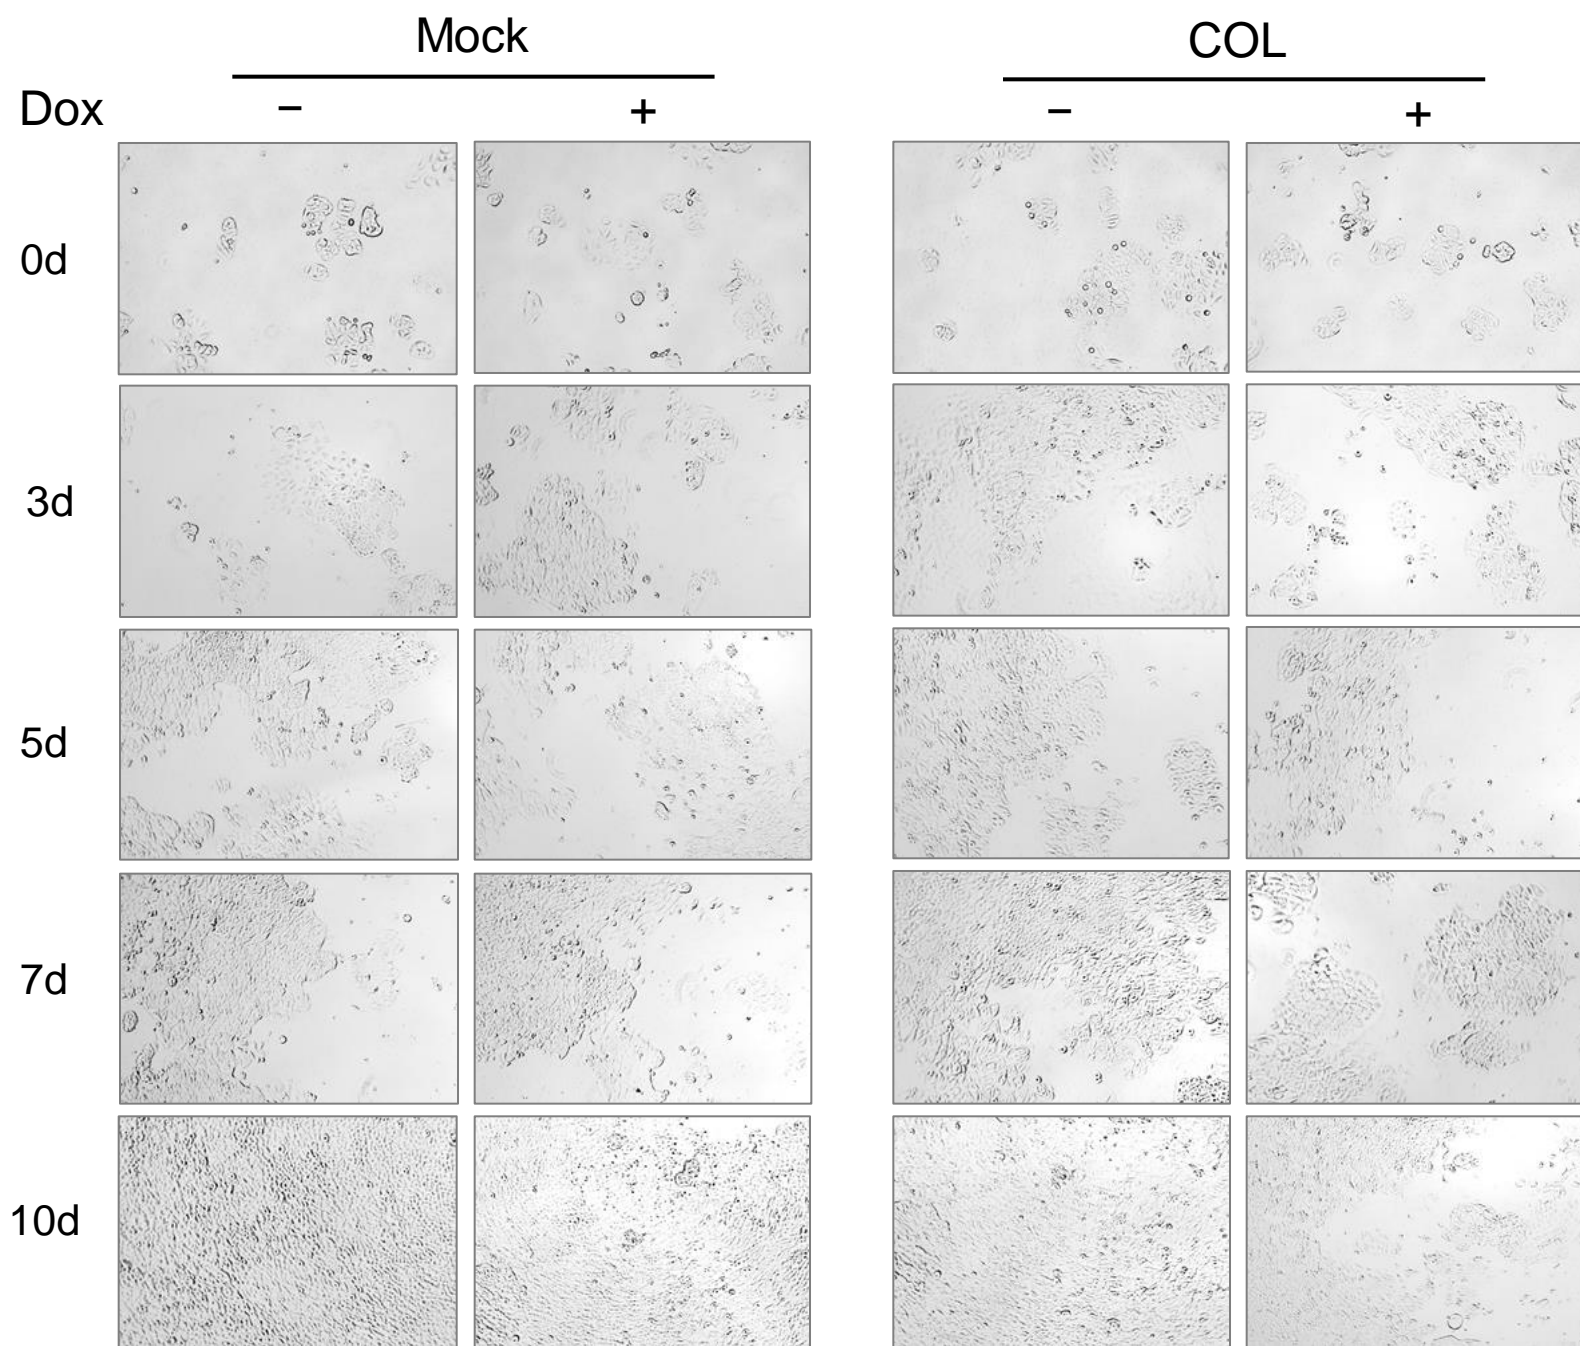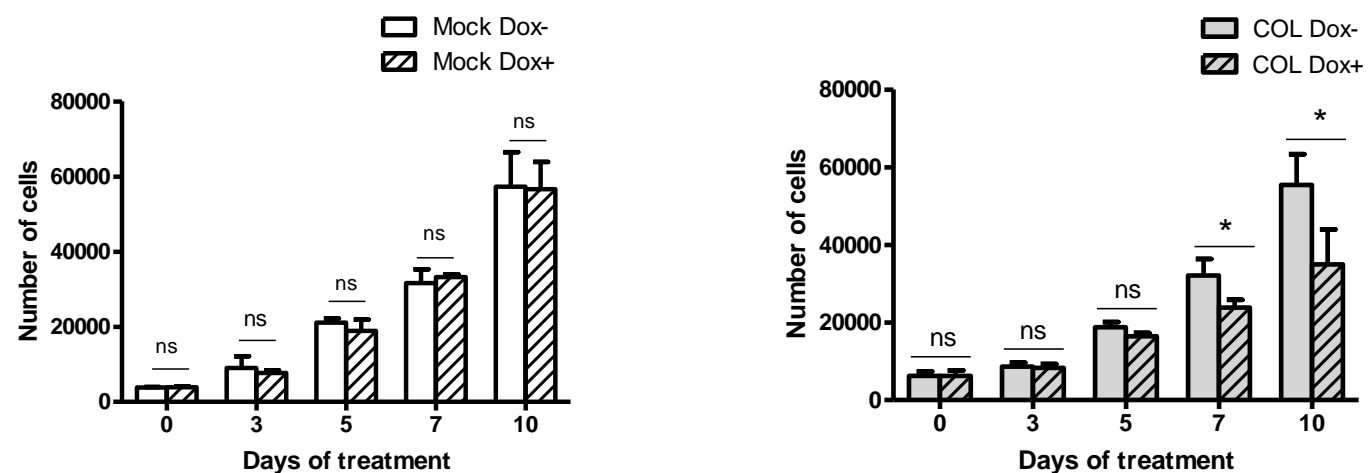

**S2 Fig. Proliferation of MCF7/COL and mock cells in 2D culture.**

MCF7/COL (COL) and mock cells were grown in 96-well plate for 48 hours and then treated with 0.1  $\mu\text{g/ml}$  of doxycycline (Dox+) or not treated (Dox-). The represented images of cell culture were taken before and at 3, 5, 7 and 10 days of Dox treatment. The number of cells were determined by cell counting ( $n = 5$  per group). The results of Dox+ were normalized to those of Dox- groups and represented as ratio in Figure 2A. Two-tailed Student's  $t$ -test; \* $P < 0.05$ , \*\* $P < 0.01$ , \*\*\* $P < 0.0001$ ; ns,  $P \geq 0.05$ .
